# Supplementary material
Source: PubMed Central journal article supplement (PMC6218314)
Supplement: NIHMS970603-supplement-Supp_info.pdf [file NIHMS970603-supplement-Supp_info.pdf]

***SUPPORTING INFORMATION***

**Spectroscopic and Metal Binding Properties of a *De Novo*  
Metalloprotein Binding a Tetrazinc Cluster**

Marco Chino, Shao-Qing Zhang, Fabio Pirro, Linda Leone, Ornella Maglio, Angela Lombardi and  
William F. DeGrado

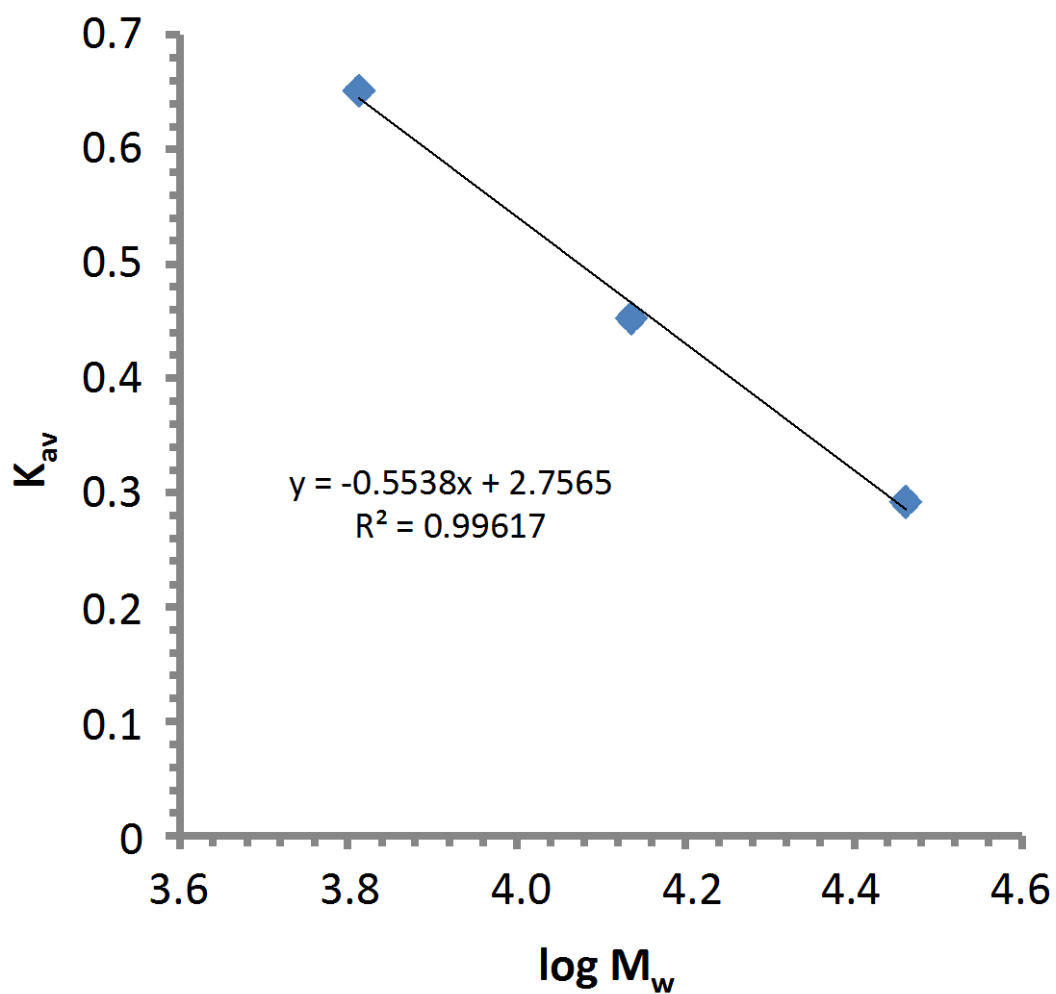

**Figure S1.** Calibration curve with standard proteins: carbonic anhydrase, ribonuclease A and aprotinin.

**Table S1.** Calibration curve parameters.

|                           | $K_{av}$ | $\log M_w$ |
|---------------------------|----------|------------|
| <b>Aprotinin</b>          | 0.65     | 3.8        |
| <b>Ribonuclease A</b>     | 0.45     | 4.1        |
| <b>Carbonic Anhydrase</b> | 0.29     | 4.5        |
